# Supplementary material for: Simultaneous invasion decouples zebra mussels and water clarity
Source: PubMed Central journal article supplement (PMC9780222; doi:10.1038/s42003-022-04355-z), 2022-12-22
Supplement: 42003_2022_4355_MOESM3_ESM.pdf [file 42003_2022_4355_MOESM3_ESM.pdf]

## Description of Additional Supplementary Files

**File name:** Supplementary Data

**Description:** Text files used to create figures (33 files total).
